# 1 Squidpy: a scalable framework for spatial single cell 2 analysis

3 Giovanni Palla<sup>\*1,2</sup>, Hannah Spitzer<sup>\*1</sup>, Michal Klein<sup>1</sup>, David Fischer<sup>1,2</sup>, Anna Christina  
4 Schaar<sup>1,2</sup>, Louis Benedikt Kuemmerle<sup>1,4</sup>, Sergei Rybakov<sup>1,3</sup>, Ignacio L. Ibarra<sup>1</sup>, Olle  
5 Holmberg<sup>1</sup>, Isaac Virshup<sup>5</sup>, Mohammad Lotfollahi<sup>1,2</sup>, Sabrina Richter<sup>1,2</sup>, Fabian J. Theis<sup>1,2,3+</sup>  
6

7 **1** Institute of Computational Biology, Helmholtz Center Munich, Germany.

8 **2** TUM School of Life Sciences Weihenstephan, Technical University of Munich, Germany.

9 **3** Department of Mathematics, Technical University of Munich, Germany.

10 **4** Institute for Tissue Engineering and Regenerative Medicine (iTERM), Helmholtz Center  
11 Munich, Germany

12 **5** Department of Anatomy and Physiology, University of Melbourne, Australia.

13

14 \*equal contribution

15 +Correspondence: [fabian.theis@helmholtz-muenchen.de](mailto:fabian.theis@helmholtz-muenchen.de)

## 16 Abstract

17 Spatial omics data are advancing the study of tissue organization and cellular  
18 communication at an unprecedented scale. Here, we present Squidpy, a Python framework  
19 that brings together tools from omics and image analysis to enable scalable description of  
20 spatial molecular data, such as transcriptome or multivariate proteins. Squidpy provides both  
21 infrastructure and numerous analysis methods that allow to efficiently store, manipulate and  
22 interactively visualize spatial omics data.

## 23 Main

24 Dissociation-based single cell technologies have enabled the deep characterization of  
25 cellular states and the creation of cell atlases of many organs and species<sup>1</sup>. However, how  
26 cellular diversity constitutes tissue organization and function is still an open question.  
27 Spatially-resolved molecular technologies aim at bridging this gap by enabling the  
28 investigation of tissues in situ at cellular and subcellular resolution<sup>2-4</sup>. In contrast to the  
29 current state of the art dissociation-based protocols, spatial molecular technologies acquire  
30 data in greatly diverse forms, in terms of resolution (few cells per observation to subcellular  
31 resolution), multiplexing (dozens of features to genome-wide expression profiles), modality  
32 (transcriptomics, proteomics and metabolomics) and often times with an associated  
33 high-content image of the captured tissue<sup>2-4</sup>. Such diversity in resulting data and  
34 corresponding formats currently represents an organisational hurdle that has hampered  
35 urgently needed development of interoperable and broad analysis methods. The underlying  
36 computational challenge requires solutions both in terms of efficient data representation as  
37 well as comprehensive analysis and visualization methods.

38

39 Hence, existing analysis frameworks for spatial data focus either on pre-processing<sup>5-8</sup> or on  
40 one particular aspect of spatial data analysis<sup>9-13</sup>. Due to the lack of a unified data  
41 representation and modular API, users so far cannot perform comprehensive analyses  
42 leveraging the full spatial modality, e.g. combining stlearn's<sup>12</sup> integrative analysis of tissue  
43 images together with Giotto's powerful spatial statistics<sup>11</sup>. A comprehensive framework that

44 enables community-driven scalable analysis of both spatial neighborhood graph and image,  
45 along with an interactive visualization module, is missing (Supplementary Table 1).

46

47 For this purpose we developed “Spatial Quantification of Molecular Data in Python”  
48 (Squidpy), a python-based framework for the analysis of spatially-resolved omics data (Fig.  
49 1). Squidpy aims to bring the diversity of spatial data in a common data representation and  
50 provide a common set of analysis and interactive visualization tools. Such infrastructure is  
51 useful in a variety of analysis settings, for different data types, and it explicitly leverages the  
52 additional information that spatial data provides: the spatial coordinates and, when available,  
53 the tissue image. Squidpy is built on top of Scanpy and Anndata<sup>14</sup>, and it relies on several  
54 scientific computing libraries in Python, such as Scikit-image<sup>15</sup> and Napari<sup>16</sup>. Its modularity  
55 makes it suitable to be interfaced with a variety of additional tools in the python data science  
56 and machine learning ecosystem, as well as several single-cell data analysis packages. It  
57 allows to quickly explore spatial datasets and lays the foundations for both spatial omics  
58 data analysis as well as novel methods development.

59

## 60 Results

### 61 *Squidpy provides technology-agnostic data representations for spatial graphs and images*

62 Squidpy introduces two main data representations to manage and store spatial omics data in  
63 a technology-agnostic way: a neighborhood graph from spatial coordinates, and large source  
64 images acquired in spatial omics data (Fig. 1b). Spatial graphs encode spatial proximity, and  
65 are, depending on data resolution, flexible in order to support the variety of neighborhood  
66 metrics that spatial data types and users may require. For instance, in Spatial  
67 Transcriptomics (ST<sup>17</sup>, Visium<sup>18</sup>, DBit-seq<sup>19</sup>), a node is a spot and a neighborhood set can be  
68 defined by a fixed number of adjacent spots whereas in imaging-based molecular data  
69 (seqFISH<sup>20</sup>, MERFISH<sup>21</sup>, Imaging Mass Cytometry<sup>22,23</sup>, CyCif<sup>24</sup>, 4i<sup>25</sup>, Spatial Metabolomics<sup>26</sup>,  
70 see Fig. 1a), a node can be defined as a cell (or pixel), and a neighborhood set can also be  
71 chosen based on a fixed radius (expressed in spatial units) from the centroid of each  
72 observation. Alternatively, other dissimilarity measures, such as euclidean distance, can be  
73 utilized to build the neighbor graph. Such data representation is suitable for many analysis  
74 tools that aim at quantifying spatial organization of the tissue. In Squidpy, we provide several  
75 tools to compute statistics at cell and gene level, such as a neighborhood enrichment score  
76 on the spatial graph, a ligand-receptor interaction analysis tool, and the Moran's I spatial  
77 autocorrelation score for spatially variable genes identification (Fig. 1c).

78 The high resolution microscopy image additionally captured by spatial omics technologies  
79 represents a rich source of morphological information that can provide key biological insights  
80 into tissue structure and cellular variation. Squidpy introduces a new data object, the Image  
81 Container, that efficiently stores the image with an on-disk/in-memory switch based on  
82 xArray and Dask<sup>27,28</sup>. The Image Container provides image analysis tools, such as  
83 performing image preprocessing, segmentation, and feature extraction, as well as interfacing  
84 with modern deep learning frameworks for more advanced analysis<sup>15</sup> (Fig. 1c right). It  
85 provides seamless integration with Napari<sup>16</sup>, thus enabling interactive visualization of  
86 analysis results stored in an Anndata object alongside the high resolution image directly from  
87 a Jupyter notebook. It also enables interactive manual cropping of tissue areas and  
88 automatic annotation of observations in Anndata. Since Napari is an image viewer in Python,

89 all the above-mentioned functionalities can be also interactively executed without additional  
90 requirements.

#### 91 *Squidpy enables calculation of spatial cellular statistics using spatial graphs*

92 A key question in the analysis of spatial molecular data is the description and quantification  
93 of spatial patterns and cellular neighborhoods across the tissue. Squidpy provides several  
94 tools that leverage the spatial graph to address such questions. For instance, a  
95 neighborhood enrichment analysis score that quantifies cluster proximity with a permutation  
96 based test (see online methods) is available. When applied to a recently published seqFISH  
97 data of mouse gastrulation<sup>29</sup>, we found several clusters to be co-enriched in their cellular  
98 neighbors (Fig. 2a,b), recapitulating the main results of the original authors. Furthermore, our  
99 implementation is scalable and ~10 fold faster than a similar implementation in Giotto<sup>11</sup>  
100 (Supplementary Fig. 1a), enabling analysis of large-scale spatial omics datasets. Squidpy  
101 also computes a co-occurrence score for clusters across spatial coordinates, which we  
102 applied to a 4i dataset of Hela cells<sup>25</sup>. We considered ~270,000 pixels as subcellular  
103 resolution observations, and evaluated their cluster co-occurrence at increasing distances  
104 (Fig. 2 c,d). As expected, the subcellular measurements annotated in the Nucleus  
105 compartment co-occur together with the Nucleus and the Nuclear envelope, at short  
106 distances. Squidpy provides additional tools to investigate features of spatial-molecular data,  
107 such as a fast and broader implementation of CellPhoneDB<sup>30</sup> for spatial ligand-receptor  
108 interaction analysis, leveraging the larger Omnipath database<sup>31</sup>, and the Moran's I spatial  
109 autocorrelation statistic for detection of spatially variable genes<sup>32</sup> (Fig 2 e,f). These statistics  
110 yield interpretable results across diverse experimental techniques, as we demonstrate on an  
111 Imaging Mass Cytometry dataset<sup>33</sup>, where we showcase additional methods like the Ripley's  
112 K function, average clustering, and degree and closeness centrality (see Supplementary Fig.  
113 3).

#### 114 *Squidpy allows analysis of images in spatial omics analysis workflows*

115 Squidpy's Image Container object provides a general mapping between pixel coordinates  
116 and molecular profile, enabling analysts to relate image-level observations to omics  
117 measurements.

118 Following standard image-base profiling techniques<sup>34</sup>, Squidpy implements a pipeline based  
119 on Scikit-image<sup>15</sup> for preprocessing and segmenting images, extracting morphological,  
120 texture, and deep learning-powered features (Supplementary Fig. 2a). To enable efficient  
121 processing of very large images, this pipeline utilises lazy loading, image tiling and  
122 multi-processing (Supplementary Fig. 1b). Features can be extracted from a raw tissue  
123 image crop, or Squidpy's nuclei-segmentation module can be used to extract nuclei counts  
124 and nuclei sizes (Supplementary Fig. 2b). For instance, we can leverage segmented nuclei  
125 to inform cell-type deconvolution methods such as Tangram<sup>35</sup> or Cell2Location<sup>36</sup>  
126 (Supplementary Fig. 4).

127 As an example of segmentation-based features, we calculated a nuclei segmentation using  
128 the DAPI stain of a fluorescence mouse brain section and showed the estimated number of  
129 nuclei per spot on the hippocampus (Fig. 2g). The cell-dense pyramidal layer can be easily  
130 distinguished with this view of the data, showcasing the richness and interpretability of  
131 information that can be extracted from tissue images when brought in a spot-based format.

132 Squidpy's feature extraction pipeline enables direct comparison and joint analysis of image  
133 data and omics data. For instance, using a Visium mouse brain dataset, we compared gene  
134 clusters with a clustering of summary features (mean, standard deviation, 0.1, 0.5, and 0.9th  
135 quantiles) of the accompanying H&E stained tissue image (Fig. 2e,h). Several image feature  
136 clusters show similarities with the gene-based clusters, especially in the hippocampus (77%  
137 overlap with image feature cluster 10), and the hypothalamus (54% overlap with image  
138 feature cluster 10), but provide a different view of the data in the cortex (no overlap >33%  
139 with any image feature clusters) (Supplementary Fig. 2e).  
140

## 141 **Conclusion**

142 In summary, Squidpy enables the analysis of spatial molecular data by leveraging two data  
143 representations: the spatial graph and the tissue image. It interfaces with Scanpy and the  
144 Python data science ecosystem, providing a scalable and extendable framework for novel  
145 methods development in the field of biological spatial molecular data. We are convinced that  
146 Squidpy could contribute to building a bridge between the molecular omics community and  
147 the image analysis and computer vision community to develop the next generation of  
148 computational methods for spatial omics technologies.

149 **Figures**

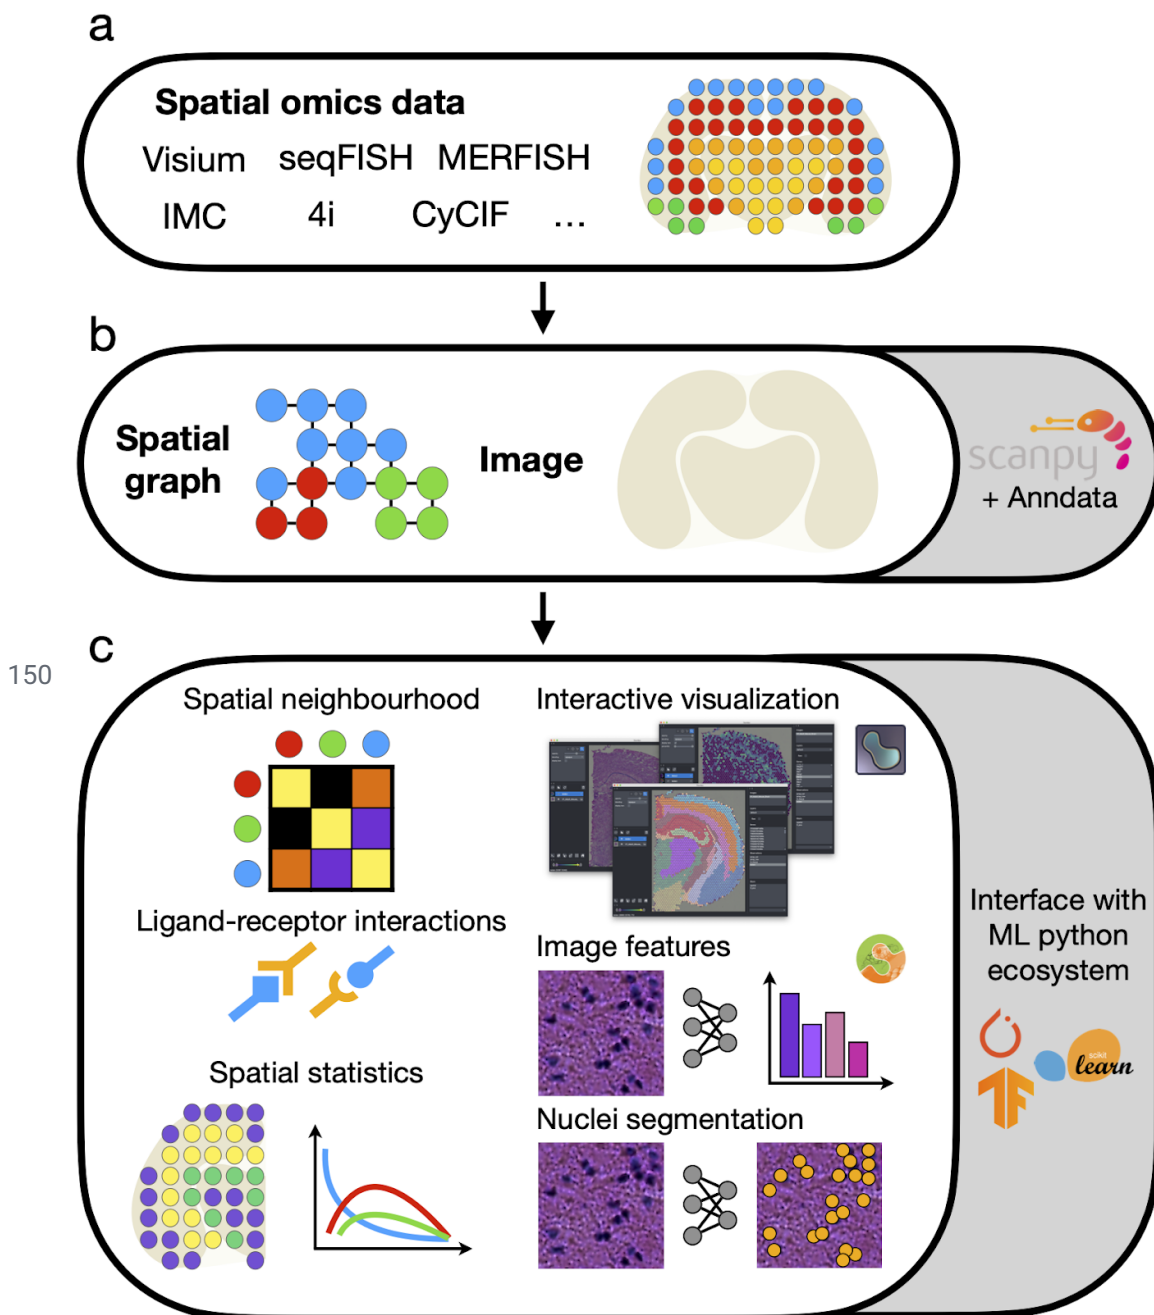

151 **Figure 1: Squidpy is a software framework for the analysis of spatial omics data.**

152 (a) Squidpy supports inputs from diverse spatial molecular technologies with spot-based,  
153 single-cell, or subcellular spatial resolution.

154 (b) Building upon the single-cell analysis software Scanpy<sup>14</sup> and the Anndata format,  
155 Squidpy provides efficient data representations of these inputs, storing spatial distances  
156 between observations in a spatial graph and providing an efficient image representation for  
157 high resolution tissue images that might be obtained together with the molecular data.

158 (c) Using these representations, several analysis functions are defined to quantitatively  
159 describe tissue organization at cellular (spatial neighborhood) and gene level (spatial  
160 statistics, spatially-variable genes and ligand-receptor interactions), to combine microscopy  
161 image information (image features and nuclei segmentation) with omics information and to  
162 interactively visualize high-resolution images.

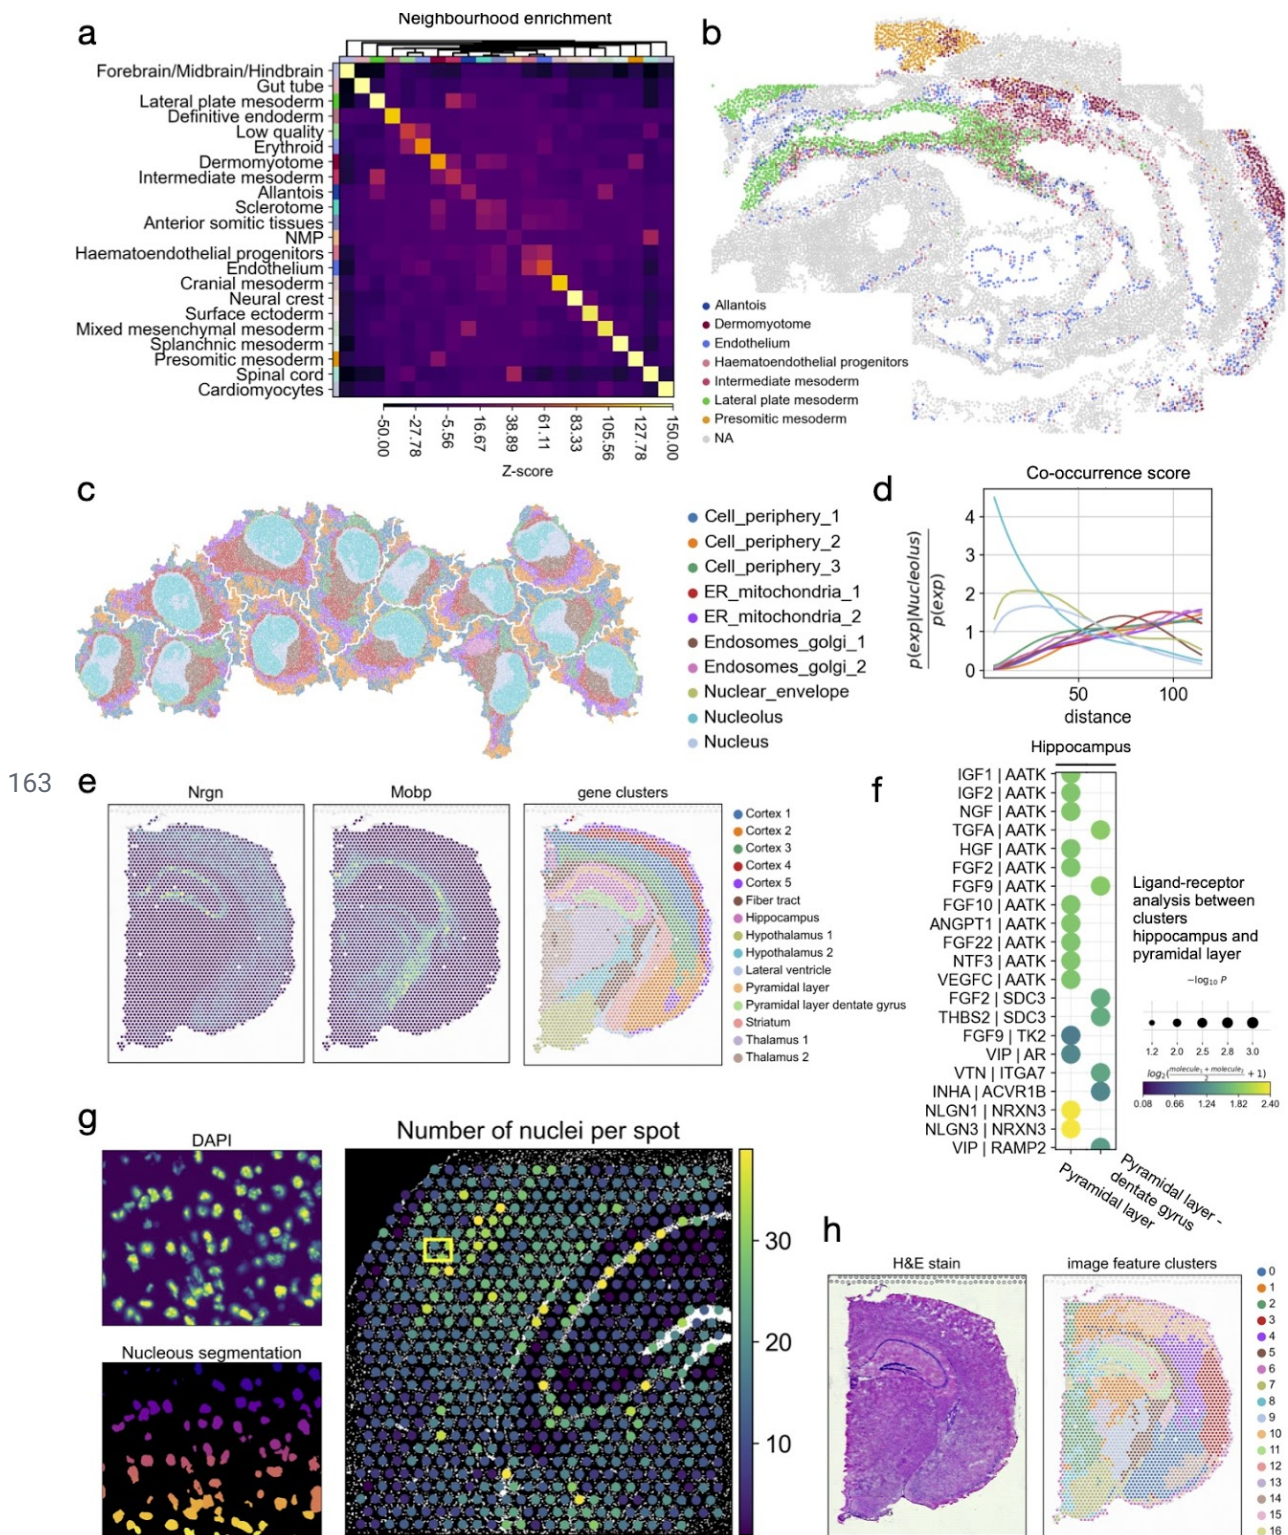

164 **Figure 2: Analysis of spatial omics datasets across diverse experimental techniques**  
 165 **using Squidpy.**

166 (a) Neighborhood enrichment analysis between cell clusters in spatial coordinates. The  
 167 "Lateral plate mesoderm" cluster is co-enriched with the "Allantois" and "Intermediate  
 168 mesoderm" cluster. Also, the "Endothelium" cluster is enriched with the "Haematoendothelial  
 169 progenitors". Both of these results were also reported by the original authors<sup>29</sup>.  
 170 (b) Visualization of selected clusters of the seqFISH mouse gastrulation dataset.  
 171 (c) Visualization of subcellular molecular profiles in HeLa Cells, plotted in spatial coordinates

172 (approx 270000 observations/pixels).

173 (d) Cluster co-occurrence score at increasing distance threshold across the tissue. The  
174 cluster "Nucleolus" is found to be co-enriched at short distances with the "Nucleus" and the  
175 "Nuclear envelope" clusters.

176 (e) Expression of *Nrgn*, *Mobp*, and clustering result from gene expression space plotted on  
177 spatial coordinates. *Nrgn* and *Mobp* are spatially variable genes defined with Moran's I  
178 global spatial autocorrelation score. The selected genes are spatially distributed and they  
179 are shared across different clusters.

180 (f) Ligand-receptor interactions from the cluster "Hippocampus" to clusters "Pyramidal Layer"  
181 and "Pyramidal layer dentate gyrus". Shown are a subset of significant ligand-receptor pairs  
182 queried using Omnipath database.

183 (g) Segmentation features derived from fluorescence image of Visium mouse brain dataset.  
184 Top left: DAPI stain. Bottom left: nuclei segmentation using DAPI stain. Right: number of  
185 nuclei in each Visium spot derived from the nuclei segmentation count. The yellow square  
186 shows the location of the inset.

187 (h) H&E stain and clustering of summary image features (channel intensity mean, standard  
188 deviation, and 0.1, 0.5, 0.9th quantiles) derived from the H&E stain at each spot location (for  
189 quantitative comparison see Supplementary Fig. 2e).

## 190 **Code and data availability**

191 Squidpy is a pip installable python package and available at the following github repository:  
192 <https://github.com/theislab/squidpy> , with documentation at:  
193 <https://squidpy.readthedocs.io/en/latest/> . All the results of this analysis can be found at the  
194 following github repository: [https://github.com/theislab/squidpy\\_reproducibility](https://github.com/theislab/squidpy_reproducibility) . The  
195 pre-processed datasets have been deposited at  
196 <https://doi.org/10.6084/m9.figshare.c.5273297.v1> and they are all conveniently accessible in  
197 Python via the *squidpy.dataset* module. The datasets used in this article are the following:  
198 Imaging Mass Cytometry<sup>33</sup>, seqFISH<sup>29</sup>, 4i<sup>25</sup>, and several Visium<sup>18</sup> datasets available from the  
199 website: <https://support.10xgenomics.com/spatial-gene-expression/datasets> .

## 200 **Acknowledgments**

201 We would like to acknowledge Luke Zappia, Malte Luecken and all the members of Theis lab  
202 for helpful discussion. We would like to acknowledge Gemma Fornons for the Squidpy logo,  
203 Scanpy developers Philipp Angerer and Fidel Ramirez for useful discussion and code  
204 revision. We would like to thank authors of original publications and 10x Genomics for  
205 making spatial omics datasets publicly available.

206

207 Sa.R., G.P. are supported by the Helmholtz Association under the joint research school  
208 "Munich School for Data Science" - MUDS.

209 A.C.S. has been funded by the German Federal Ministry of Education and Research (BMBF)  
210 under Grant No. 01IS18036B.

211 F.J.T. acknowledges support by the BMBF (grant# 01IS18036B, grant# 01IS18053A and  
212 grant# 031L0210A), the European Union's Horizon 2020 research and innovation  
213 programme under grant agreement No 874656, the Chan Zuckerberg Initiative DAF (advised  
214 fund of Silicon Valley Community Foundation, grant # 2019-207271) and by the Helmholtz  
215 Association's Initiative and Networking Fund through Helmholtz AI [grant number:  
216 ZT-I-PF-5-01] and sparse2big [grant number ZT-I-007].

217 F.J.T. reports receiving consulting fees from Roche Diagnostics GmbH and Cellarity Inc., and  
218 ownership interest in Cellarity, Inc. and Dermagnostix

## 219 **Author contributions**

220 G.P., H.S., M.K., D.F., F.J.T. designed the study. G.P., H.S., M.K., D.F., A.C.S, L.B.K., Se.R.,  
221 I.L.I., O.H., I.V., M.L. , Sa.R. wrote the code. G.P., H.S., M.K. performed the analysis. F.J.T.  
222 supervised the work. All authors read and corrected the final manuscript.



## 223 Supplements

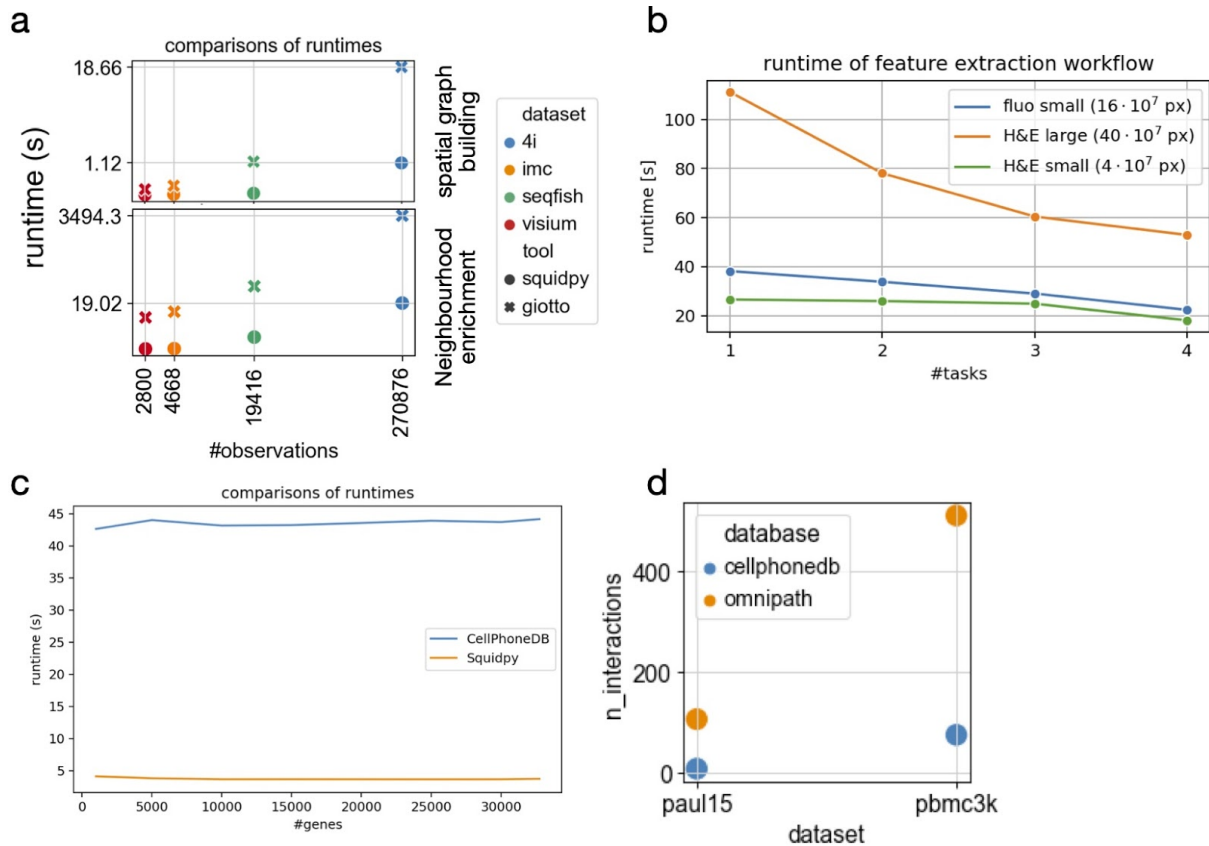

224

## 225 Supplementary Figure 1. Benchmarking resources for Squidpy analysis modules.

226 Benchmarks (a) and (b) were run on a 2,4 GHz Intel Core i5 processor with 4 cores and 16  
 227 GB RAM. Benchmarks (c) and (d) were run on a Centos 8 server cluster with 32 cores and  
 228 128 GB of memory. Unless explicitly mentioned, functions were run without parallelization.

229

230 (a) Execution times for spatial graph building and neighborhood enrichment analysis,  
 231 comparing four spatial datasets at increasing number of observations. Squidpy outperforms  
 232 similar functions provided by the Giotto toolkit<sup>11</sup>, for any dataset and task. Reported are  
 233 mean values for 10 runs, except for the 4i neighbor enrichment test that was run only once in  
 234 Giotto.

235

236 (b) Execution time for typical feature extraction workflow on different datasets. The feature  
 237 extraction workflow consisted of segmenting the image using watershed with a fixed  
 238 threshold, and extracting summary and segmentation features with default parameters. The  
 239 segmentation was done using image tiles of size 2000. Using more cores (tasks) linearly  
 240 decreases computation time for the feature extraction workflow, enabling processing of very  
 241 large images (>400M pixels).

242

243 (c) Execution time for Squidpy's implementation of the CellphoneDB permutation-based test,  
 244 at an increasing number of genes for the development of human forebrain dataset<sup>37</sup>.

245

246 (d) Squidpy implementation of the CellphoneDB permutation-based tests uses the full  
 247 Omnipath database for ligand receptor annotations. For two datasets (paul15<sup>38</sup> mouse and  
 248 pbmc3k<sup>39</sup> human), Omnipath in Squidpy can recover a higher number of interactions.



256 computed both at spot level, or at segmentation mask level, enabling the analysis to relate  
257 any pixel-level metric to the molecular profile.

258

259 (b) Segmentation features extracted using a watershed segmentation. Extension of Figure 2  
260 (a). From left to right are shown: number of nuclei underneath each Visium spot, mean  
261 intensity of anti-NEUN channel within the nuclei masks, mean intensity of anti-GFAP channel  
262 within the nuclei masks, and a leiden clustering of the gene expression values. The  
263 segmentation features provide interpretable, additional information to the gene-space  
264 clustering. We can see that the cell-rich pyramidal layer of the Hippocampus has more cells  
265 than the surrounding areas. This fine-grained differentiation of the Hippocampus is not  
266 visible in the gene clusters, where the Hippocampus is only one cluster. The per-channel  
267 intensities show that the areas labelled with "Cortex\_1" and  
268 "Cortex\_3" have a higher intensity of neurons (higher intensity of anti-NEUN channel) and  
269 that clusters "Fiber\_tracts" and "lateral ventricles" are enriched with glial cells (higher  
270 intensity of anti-GFAP channel).

271

272 (c) Qualitative comparison of gene-space clustering (left) with clustering of ResNet features  
273 (center) and clustering of summary features (right, see Fig. 2b) using a mouse brain Visium  
274 dataset with an H&E microscopy image. ResNet features were calculated by training a  
275 pre-trained ResNet model to predict the gene-expression cluster assignment (shown on the  
276 left) and taking the feature vector of the last fully connected layer as data representation.

277

278 (d) Confusion matrix showing the proportion of assigned labels in gene clusters and resnet  
279 embedding clusters from (c). Rows correspond to clusters in gene expression space (c) left),  
280 columns correspond to resnet embedding clusters (c) center). The heatmap shows the  
281 proportion of overlapping observations in each cluster annotation. For instance, for  
282 "Thalamus\_2" cluster, 88% of observations are annotated as cluster 2 in the resnet  
283 embedding visualization. We can see that for some cluster labels the prediction was strong,  
284 whereas for others the resnet model was unable to discriminate the labels. For instance,  
285 some regions of the cortex and hypothalamus seemed to not have been accurately  
286 classified. This showcases how the image container object can be used to relate morphology  
287 information from the source image to any annotation in the Anndata object.

288

289 (e) Confusion matrix showing the proportion of assigned labels in gene clusters and image  
290 summary feature clusters from (c). Rows correspond to clusters in gene expression space  
291 (c) left), columns correspond to image summary feature clusters (c) center). The heatmap  
292 shows the proportion of overlapping observations in each cluster annotation. Several of the  
293 gene clusters are recognizable using simple image features. E.g., "Hypothalamus\_1" is  
294 overlapping to 77% with cluster 8, "Hippocampus" is overlapping to 54% with cluster 10, and  
295 "Pyramidal\_layer" and "Pyramidal\_layer\_dentate\_gyrus" are covered to 43%/44% by cluster  
296 14. In other regions, especially the cortex (clusters "Cortex\_1", "Cortex\_3", "Cortex\_4"), the  
297 image clusters do not overlap well (no cluster overlap > 33%), showing that in these regions  
298 simple image features and gene expression values show different patterns.

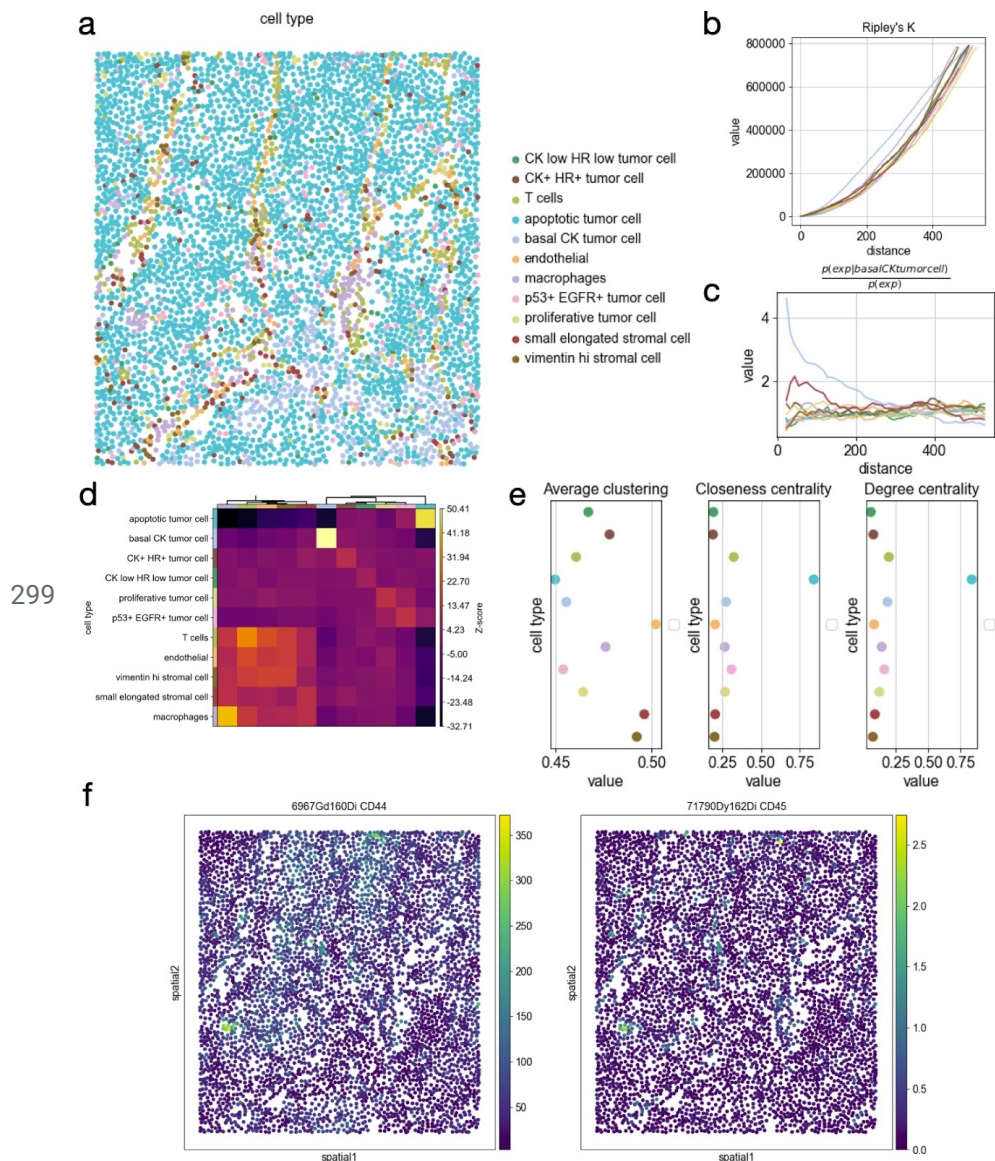

299

300 **Supplementary Figure 3. Example analysis of Imaging Mass Cytometry data from**

301 **breast cancer biopsies.**

302 (a) Spatial visualization of cell types as defined by the original authors<sup>33</sup>.

303 (b) Ripley's K statistics computed at increasing distances threshold across the tissue. There

304 is no clear spatial pattern in the data, except for a small increased clustering pattern of the

305 "basal CK tumor cell", which can be visualized in the lower-right section of the spatial plot.

306 (c) Co-occurrence analysis of cell types at increasing distance thresholds across the tissue.

307 Visualized is the probability conditioned on the presence of the "basal CK tumor cell".

308 Interestingly, we can observe a slight co-enrichment with the "small elongated stromal cell"

309 cluster.

310 (d) Neighborhood enrichment analysis between cell type clusters in the spatial graph. We

311 can observe how the immune cell subsets and stromal cells seem to form a closer

312 neighborhood as opposed to the tumor cells.

313 (e) Network centralities for cell types (nodes of the spatial graph). The "apoptotic tumor cell"

314 cluster shows high closeness and degree centrality, and it is indeed the most abundant and

315 spread class label in the graph.

316 (f) Visualization of two markers for immune cell populations, visualized in spatial coordinates.

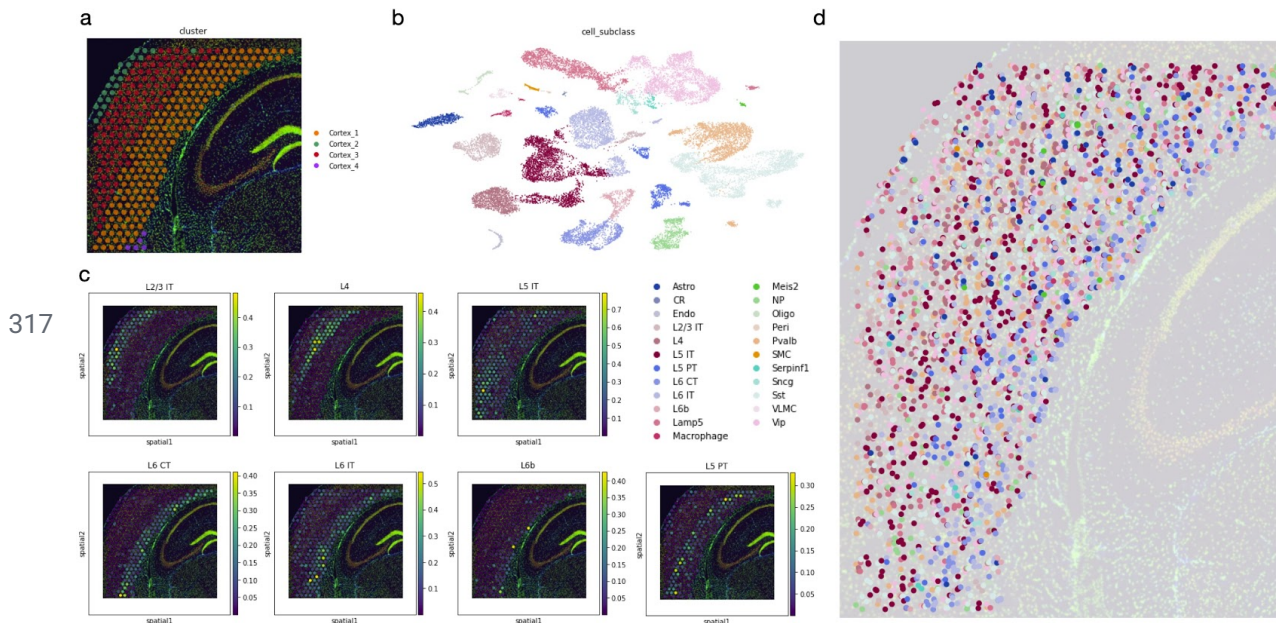

332

|                                   | Squidpy                                                                                                                                              | stLearn                                                                                                                                                               | Giotto                                                                                                                                          | Seurat (spatial)                                                                        | SpatialExperiment                                  | STUtility                                                                                |
|-----------------------------------|------------------------------------------------------------------------------------------------------------------------------------------------------|-----------------------------------------------------------------------------------------------------------------------------------------------------------------------|-------------------------------------------------------------------------------------------------------------------------------------------------|-----------------------------------------------------------------------------------------|----------------------------------------------------|------------------------------------------------------------------------------------------|
| <b>Package focus</b>              | Efficient unified data representations for spatial data, comprehensive spatial graph and image analysis tools, (interactive) visualisation in python | Method to combine image information with gene expression measurements in a joint representation. Provides several additional analysis tools for spatial data analysis | Spatial analysis and visualisation in R: a comprehensive package tool that provides analysis and visualization tool for spatial graph and image | Seurat extension to support spatial visualization and spatially variable genes analysis | Bioconductor object to store spatial genomics data | Tool to analyze and visualize spatial transcriptomics data and the microscopy image in R |
| <b>Infrastructure</b>             |                                                                                                                                                      |                                                                                                                                                                       |                                                                                                                                                 |                                                                                         |                                                    |                                                                                          |
| Store large tissue image (>500Mb) | Yes                                                                                                                                                  | No                                                                                                                                                                    | Yes                                                                                                                                             | No                                                                                      | No                                                 | Yes                                                                                      |
| Store small tissue image (<10Mb)  | Yes                                                                                                                                                  | Yes                                                                                                                                                                   | Yes                                                                                                                                             | Yes                                                                                     | Yes                                                | Yes                                                                                      |
| Build spatial neighborhood graph  | Yes                                                                                                                                                  | No                                                                                                                                                                    | Yes                                                                                                                                             | No                                                                                      | NA                                                 | Yes (only knn)                                                                           |
|                                   |                                                                                                                                                      |                                                                                                                                                                       |                                                                                                                                                 |                                                                                         |                                                    |                                                                                          |
| <b>Spatial analysis</b>           |                                                                                                                                                      |                                                                                                                                                                       |                                                                                                                                                 |                                                                                         |                                                    |                                                                                          |
| Spatial statistics for cell types | Yes                                                                                                                                                  | Partial (no spatial graph)                                                                                                                                            | Yes                                                                                                                                             | No                                                                                      | NA                                                 | No                                                                                       |
| Spatially variable genes          | Yes                                                                                                                                                  | Yes                                                                                                                                                                   | Yes                                                                                                                                             | Yes                                                                                     | NA                                                 | Yes                                                                                      |
| Ligand-receptor analysis          | Yes                                                                                                                                                  | Partial (no database)                                                                                                                                                 | Partial (no database)                                                                                                                           | No                                                                                      | NA                                                 | No                                                                                       |
|                                   |                                                                                                                                                      |                                                                                                                                                                       |                                                                                                                                                 |                                                                                         |                                                    |                                                                                          |
| <b>Image analysis</b>             |                                                                                                                                                      |                                                                                                                                                                       |                                                                                                                                                 |                                                                                         |                                                    |                                                                                          |
| Morphology features (Standard)    | Yes                                                                                                                                                  | No                                                                                                                                                                    | No                                                                                                                                              | No                                                                                      | NA                                                 | No                                                                                       |
| Morphology features (DNN based)   | Yes                                                                                                                                                  | Yes (only low res image)                                                                                                                                              | No                                                                                                                                              | No                                                                                      | NA                                                 | No                                                                                       |
| Segmentation                      | Yes                                                                                                                                                  | No                                                                                                                                                                    | No                                                                                                                                              | No                                                                                      | NA                                                 | No                                                                                       |
| Registration                      | No                                                                                                                                                   | No                                                                                                                                                                    | No                                                                                                                                              | No                                                                                      | NA                                                 | Yes                                                                                      |
| Interface with DL framework       | Yes                                                                                                                                                  | Yes                                                                                                                                                                   | No                                                                                                                                              | No                                                                                      | NA                                                 | No                                                                                       |
|                                   |                                                                                                                                                      |                                                                                                                                                                       |                                                                                                                                                 |                                                                                         |                                                    |                                                                                          |
| <b>Integration</b>                |                                                                                                                                                      |                                                                                                                                                                       |                                                                                                                                                 |                                                                                         |                                                    |                                                                                          |
| Image-gene expression integration | Yes (with external tool)                                                                                                                             | Yes                                                                                                                                                                   | No                                                                                                                                              | No                                                                                      | NA                                                 | No                                                                                       |
| Mapping/Deconvolution             | Yes (with external tool)                                                                                                                             | Yes (with external tool)                                                                                                                                              | Yes (with external tool)                                                                                                                        | Yes                                                                                     | NA                                                 | No                                                                                       |
|                                   |                                                                                                                                                      |                                                                                                                                                                       |                                                                                                                                                 |                                                                                         |                                                    |                                                                                          |
| <b>Visualization</b>              |                                                                                                                                                      |                                                                                                                                                                       |                                                                                                                                                 |                                                                                         |                                                    |                                                                                          |
| 2d static                         | Yes                                                                                                                                                  | Yes                                                                                                                                                                   | Yes                                                                                                                                             | Yes                                                                                     | NA                                                 | Yes                                                                                      |
| 3d static                         | No                                                                                                                                                   | No                                                                                                                                                                    | Yes                                                                                                                                             | No                                                                                      | NA                                                 | Yes                                                                                      |
| 2d interactive                    | Yes                                                                                                                                                  | No                                                                                                                                                                    | Yes                                                                                                                                             | No                                                                                      | NA                                                 | Yes                                                                                      |
| Interactive cropping              | Yes                                                                                                                                                  | No                                                                                                                                                                    | Yes                                                                                                                                             | No                                                                                      | NA                                                 | No                                                                                       |
|                                   |                                                                                                                                                      |                                                                                                                                                                       |                                                                                                                                                 |                                                                                         |                                                    |                                                                                          |
| <b>Others</b>                     |                                                                                                                                                      |                                                                                                                                                                       |                                                                                                                                                 |                                                                                         |                                                    |                                                                                          |
| Unit tests                        | Yes                                                                                                                                                  | No                                                                                                                                                                    | No                                                                                                                                              | Yes                                                                                     | Yes                                                | No                                                                                       |
| Documentation                     | Yes                                                                                                                                                  | Yes                                                                                                                                                                   | Yes                                                                                                                                             | Yes                                                                                     | Yes                                                | Yes                                                                                      |
| Framework                         | Python                                                                                                                                               | Python                                                                                                                                                                | R/Python/ImageMagick                                                                                                                            | R                                                                                       | R                                                  | R                                                                                        |

333

334 **Supplementary Table 1. Comparison of Squidpy features to existing tools for spatial**  
 335 **molecular data analysis**

336 Rows correspond to a set of analysis features that are specific for working with spatial  
 337 molecular data. It is subdivided in Infrastructure, Spatial Analysis, Image Analysis,  
 338 Integration, Visualization and Others. The columns contain software tools that are tailored for  
 339 spatial data analysis. Entries have been labelled according to whether the software tool is  
 340 able to provide a specific functionality, whether it's partially available or whether it's missing.  
 341 The row "Framework" specifies which programming languages are necessary to use all of  
 342 the functionalities of the package. Finally, for SpatialExperiment, since it is an object to store  
 343 spatial transcriptomics data, the analysis features do not apply.

## 344 **References**

- 345 1. Regev, A. *et al.* The Human Cell Atlas. *Elife* **6**, (2017).
- 346 2. Larsson, L., Frisén, J. & Lundeberg, J. Spatially resolved transcriptomics adds a new  
347 dimension to genomics. *Nat. Methods* **18**, 15–18 (2021).
- 348 3. Zhuang, X. Spatially resolved single-cell genomics and transcriptomics by imaging. *Nat.*  
349 *Methods* **18**, 18–22 (2021).
- 350 4. Spitzer, M. H. & Nolan, G. P. Mass Cytometry: Single Cells, Many Features. *Cell* **165**,  
351 780–791 (2016).
- 352 5. Axelrod, S. *et al.* Starfish: Open Source Image Based Transcriptomics and Proteomics  
353 Tools. (2018).
- 354 6. Prabhakaran, S., Nawy, T. & Pe'er, D. Sparcle: assigning transcripts to cells in  
355 multiplexed images. *Cold Spring Harbor Laboratory* 2021.02.13.431099 (2021)  
356 doi:10.1101/2021.02.13.431099.
- 357 7. Park, J. *et al.* Cell segmentation-free inference of cell types from in situ transcriptomics  
358 data. *Cold Spring Harbor Laboratory* 800748 (2020) doi:10.1101/800748.
- 359 8. Petukhov, V., Khodosevich, K., Soldatov, R. A. & Kharchenko, P. V. Bayesian  
360 segmentation of spatially resolved transcriptomics data. 2020.10.05.326777 (2020)  
361 doi:10.1101/2020.10.05.326777.
- 362 9. Butler, A., Hoffman, P., Smibert, P., Papalexi, E. & Satija, R. Integrating single-cell  
363 transcriptomic data across different conditions, technologies, and species. *Nat.*  
364 *Biotechnol.* **36**, 411–420 (2018).
- 365 10. Righelli, D. *et al.* SpatialExperiment: infrastructure for spatially resolved transcriptomics  
366 data in R using Bioconductor. *Cold Spring Harbor Laboratory* 2021.01.27.428431 (2021)  
367 doi:10.1101/2021.01.27.428431.
- 368 11. Dries, R. *et al.* Giotto, a pipeline for integrative analysis and visualization of single-cell  
369 spatial transcriptomic data. *bioRxiv* 701680 (2019) doi:10.1101/701680.
- 370 12. Pham, D. *et al.* stLearn: integrating spatial location, tissue morphology and gene  
371 expression to find cell types, cell-cell interactions and spatial trajectories within

- 372 undissociated tissues. *Bioarxiv* (2020) doi:10.1101/2020.05.31.125658.
- 373 13. Bergenstråhle, J., Larsson, L. & Lundeberg, J. Seamless integration of image and  
374 molecular analysis for spatial transcriptomics workflows. *BMC Genomics* **21**, 482  
375 (2020).
- 376 14. Wolf, F. A., Angerer, P. & Theis, F. J. SCANPY: large-scale single-cell gene expression  
377 data analysis. *Genome Biol.* **19**, 15 (2018).
- 378 15. van der Walt, S. *et al.* scikit-image: image processing in Python. *PeerJ* **2**, e453 (2014).
- 379 16. Sofroniew, N. *et al.* *napari/napari: 0.4.4rc0*. (2021). doi:10.5281/zenodo.4470554.
- 380 17. Ståhl, P. L. *et al.* Visualization and analysis of gene expression in tissue sections by  
381 spatial transcriptomics. *Science* **353**, 78–82 (2016).
- 382 18. Visium Spatial Gene Expression Reagent Kits User Guide.  
383 <https://support.10xgenomics.com/spatial-gene-expression/library-prep/doc/user-guide-visium-spatial-gene-expression-reagent-kits-user-guide>.  
384
- 385 19. Liu, Y. *et al.* High-Spatial-Resolution Multi-Omics Sequencing via Deterministic  
386 Barcoding in Tissue. *Cell* **183**, 1665–1681.e18 (2020).
- 387 20. Eng, C.-H. L. *et al.* Transcriptome-scale super-resolved imaging in tissues by RNA  
388 seqFISH. *Nature* **568**, 235–239 (2019).
- 389 21. Chen, K. H., Boettiger, A. N., Moffitt, J. R., Wang, S. & Zhuang, X. RNA imaging.  
390 Spatially resolved, highly multiplexed RNA profiling in single cells. *Science* **348**,  
391 aaa6090 (2015).
- 392 22. Giesen, C. *et al.* Highly multiplexed imaging of tumor tissues with subcellular resolution  
393 by mass cytometry. *Nat. Methods* **11**, 417–422 (2014).
- 394 23. Keren, L. *et al.* MIBI-TOF: A multiplexed imaging platform relates cellular phenotypes  
395 and tissue structure. *Sci Adv* **5**, eaax5851 (2019).
- 396 24. Lin, J.-R., Fallahi-Sichani, M., Chen, J.-Y. & Sorger, P. K. Cyclic Immunofluorescence  
397 (CyclF), A Highly Multiplexed Method for Single-cell Imaging. *Curr. Protoc. Chem. Biol.*  
398 **8**, 251–264 (2016).
- 399 25. Gut, G., Herrmann, M. D. & Pelkmans, L. Multiplexed protein maps link subcellular



- 400 organization to cellular states. *Science* **361**, (2018).
- 401 26. Alexandrov, T. Spatial Metabolomics and Imaging Mass Spectrometry in the Age of  
402 Artificial Intelligence. *Annu. Rev. Biomed. Data Sci.* **3**, 61–87 (2020).
- 403 27. Dask Development Team. Dask: Library for dynamic task scheduling. (2016).
- 404 28. Hoyer, S. & Hamman, J. J. xarray: N-D labeled Arrays and Datasets in Python. *J. Open*  
405 *Res. Softw.* **5**, (2017).
- 406 29. Lohoff, T. *et al.* Highly multiplexed spatially resolved gene expression profiling of mouse  
407 organogenesis. *Cold Spring Harbor Laboratory* 2020.11.20.391896 (2020)  
408 doi:10.1101/2020.11.20.391896.
- 409 30. Efremova, M., Vento-Tormo, M., Teichmann, S. A. & Vento-Tormo, R. CellPhoneDB:  
410 inferring cell-cell communication from combined expression of multi-subunit  
411 ligand-receptor complexes. *Nat. Protoc.* **15**, 1484–1506 (2020).
- 412 31. Türei, D. *et al.* Integrated intra- and intercellular signaling knowledge for multicellular  
413 omics analysis. *Cold Spring Harbor Laboratory* 2020.08.03.221242 (2020)  
414 doi:10.1101/2020.08.03.221242.
- 415 32. Getis, A. & Ord, J. K. The analysis of spatial association by use of distance statistics.  
416 *Geogr. Anal.* **24**, 189–206 (2010).
- 417 33. Jackson, H. W. *et al.* The single-cell pathology landscape of breast cancer. *Nature* **578**,  
418 615–620 (2020).
- 419 34. McQuin, C. *et al.* CellProfiler 3.0: Next-generation image processing for biology. *PLoS*  
420 *Biol.* **16**, e2005970 (2018).
- 421 35. Biancalani, T. *et al.* Deep learning and alignment of spatially-resolved whole  
422 transcriptomes of single cells in the mouse brain with Tangram. 2020.08.29.272831  
423 (2020) doi:10.1101/2020.08.29.272831.
- 424 36. Kleshchevnikov, V. *et al.* Comprehensive mapping of tissue cell architecture via  
425 integrated single cell and spatial transcriptomics. *Cold Spring Harbor Laboratory*  
426 2020.11.15.378125 (2020) doi:10.1101/2020.11.15.378125.
- 427 37. La Manno, G. *et al.* RNA velocity of single cells. *Nature* **560**, 494–498 (2018).

- 428 38. Paul, F. *et al.* Transcriptional Heterogeneity and Lineage Commitment in Myeloid  
429 Progenitors. *Cell* **163**, 1663–1677 (2015).
- 430 39. pbmc3k -Datasets -Single Cell Gene Expression -Official 10x Genomics Support.  
431 <https://support.10xgenomics.com/single-cell-gene-expression/datasets/1.1.0/pbmc3k>.
- 432 40. Tasic, B. *et al.* Shared and distinct transcriptomic cell types across neocortical areas.  
433 *Nature* **563**, 72–78 (2018).

---

# Squidpy - Online Methods

---

Giovanni Palla<sup>1,2\*</sup> Hannah Spitzer<sup>1\*</sup> Michal Klein<sup>1</sup> David Fischer<sup>1,2</sup> Anna Christina Schaar<sup>1,3</sup>  
Louis Benedikt Kuemmerle<sup>1,3</sup> Sergei Rybakov<sup>1,3</sup> Ignacio L. Ibarra<sup>1</sup> Olle Holmberg<sup>1</sup> Isaac Virshup<sup>5</sup>  
Mohammad Lotfollahi<sup>1,2</sup> Sabrina Richter<sup>1,2</sup> Fabian J. Theis<sup>1,2,3°</sup>

**1** Institute of Computational Biology, Helmholtz Center Munich, Germany.

**2** TUM School of Life Sciences Weihenstephan, Technical University of Munich, Germany.

**3** Department of Mathematics, TU Munich, Germany.

**4** Institute for Tissue Engineering and Regenerative Medicine (iTERM), Helmholtz Center Munich, Germany.

**5** Department of Anatomy and Physiology, University of Melbourne, Australia.

\*equal contribution

°Correspondence: [fabian.theis@helmholtz-muenchen.de](mailto:fabian.theis@helmholtz-muenchen.de)

## Contents

|   |                                                               |   |
|---|---------------------------------------------------------------|---|
| 1 | <a href="#">Infrastructure</a> . . . . .                      | 2 |
| 2 | <a href="#">Graph and spatial patterns analysis</a> . . . . . | 3 |
| 3 | <a href="#">Image analysis and segmentation</a> . . . . .     | 5 |

## Online methods

### 1 Infrastructure

**Spatial graph** The spatial graph is a graph of spatial neighbors with cells (or spots in case of Visium) as nodes and neighborhood relations between spots as edges. We use spatial coordinates of spots to identify neighbors among them. Different approach of defining a neighborhood relation among spots are used for different types of spatial datasets.

Visium spatial datasets have a hexagonal outline for their spots, i.e each spot has up to eight spots situated around it. For this type of spatial dataset the parameter `n_rings` should be used. It specifies for each spot how many hexagonal rings of spots around it will be considered neighbors.

```
sq.gr.spatial_neighbors(adata, coord_type="visium", n_rings=<int>)
```

For the other types of spatial datasets neighbors can be defined as the closest spots in terms of euclidean distance between their coordinates. For a fixed number of the closest spots for each spot, it leverages the k-nearest neighbors search from Scikit-learn<sup>1</sup> and `n_neigh` must be used.

```
sq.gr.spatial_neighbors(adata, coord_type="generic", n_neigh=<int>)
```

In order to get all spots within a specified radius (in units of the spatial coordinates) from each spot as neighbors, the parameter `radius` should be used.

```
sq.gr.spatial_neighbors(adata, coord_type="generic", radius=<float>)
```

The function builds a spatial graph and saves its adjacency and weighted adjacency matrices to `adata.obsp['spatial_connectivities']` in either Numpy<sup>2</sup> or Scipy sparse arrays<sup>3</sup>. The weights of the weighted adjacency matrix are distances in the case of `coord_type="generic"` and ordinal numbers of hexagonal rings in the case of `coord_type="visium"`. Together with the connectivities, we also provide a sparse adjacency matrix of distances, saved in `adata.obsp['spatial_distances']` We also provide spectral and cosine transformation of the adjacency matrix for uses in graph convolutional networks<sup>4</sup>.

**Image Container** The Image Container is an object for microscopy tissue images associated with spatial molecular datasets. The object is a thin wrapper of an `xarray.Dataset`<sup>5</sup> and provides efficient access to in-memory and on-disk images. On-disk files are loaded lazily using `dask`<sup>6</sup> through `rasterio`<sup>7</sup>, meaning content is only read in memory when requested. The object can be saved as a zarr store `zarr`<sup>8</sup>. This allows handling very large files that do not fit in memory.

Image Container is initialised with an in-memory array or a path to an image file on disk. Images are saved with the key `layer`. If lazy loading is desired, the `chunks` parameter needs to be specified.

```
sq.im.ImageContainer(PATH, layer=<str>, chunks=<int>)
```

More images layers with the same spatial dimensions x and y like segmentation masks can be added to an existing Image Container.

```
img.add_img(PATH, layer_added=<str>)
```

The Image Container is able to interface with Anndata objects, in order to relate any pixel-level information to the observations stored in Anndata (e.g. cells, spots etc.). For instance, it is possible to create a generator that yields image's crops on-the-fly corresponding to locations of the spots in the image:

```
spot_generator = img.generate_spot_crops(adata)
lambda x: (x for x in spot_generator) # yields crops at spots location
```

This of course works for both features computed at crop-level but also at segmentation-object level. For instance, it is possible to get centroids coordinates as well as several features of the segmentation object that overlap with the spot capture area.

**Napari for interactive visualization** Napari is a fast, interactive, multi-dimensional image viewer in Python<sup>9</sup>. In squidpy, it is possible to visualize the source image together with any anndata annotation with Napari. Such functionality is useful for fast and interactive exploration of analysis results saved in anndata together with the high resolution image. Furthermore, leveraging Napari functionalities, it is possible to manually annotate tissue areas and assign underlying spots to annotations saved in the Anndata object. Such ability to relate manually defined tissue areas to observations in anndata is particularly useful in settings where there is a pathologist annotation available and it needs to be integrated with analysis at gene expression or image level. All the steps described here are done in Python, therefore available in the same environment where the analysis is performed (it does not require an additional tool).

```
img = sq.im.ImageContainer(PATH, layer=<str>)
img.interactive(adata)
```

## 2 Graph and spatial patterns analysis

**Neighborhood enrichment test** The association between label pairs in the connectivity graph is estimated by counting the sum of nodes that belong to classes  $i$  and  $j$  (e.g. cluster annotation) and are proximal to each other, noted  $x_{ij}$ . To estimate the deviation of this number versus a random configuration of cluster labels in the same connectivity graph, we scramble the cluster labels while maintaining the connectivities, and then recount the number of nodes recovered in each iteration (1,000 times by default). Using these estimates, we calculate expected means ( $\mu_{ij}$ ) and standard deviations ( $\sigma_{ij}$ ) for each pair, and a Z-score as,

$$Z_{ij} = (x_{ij} - \mu_{ij}) / \sigma_{ij}$$

The Z-score indicates if a cluster pair is over-represented or over-depleted for node-node interactions in the connectivity graph. This approach was first described (to the best of our knowledge) by Schapiro et al<sup>10</sup>. The analysis and visualization can be performed with the analysis code showed below.

```
sq.gr.nhood_enrichment(adata, cluster_key="<cluster_key>")
sq.pl.nhood_enrichment(adata, cluster_key="<cluster_key>")
```

Our implementation leverages just-in-time compilation with Numba<sup>11</sup> to achieve greater performances in computation time (see **Supplementary figure 1**).

**Ligand-receptor interaction analysis** We provide a re-implementation of the popular Cellphonedb method for ligand-receptor interaction analysis<sup>12</sup>. In short, it's a permutation-based test of ligand-receptor expression across cell-types combinations. Given a list of annotated ligand-receptor pairs, the test computes the mean expression of the two molecules (ligand, receptor) between cell types, and builds a null-distribution based on  $n$  permutations (default 1000). A p-value is computed based on the proportion of the permuted means against the true mean. In Cellphonedb, if a receptor or ligand is composed of several subunits, the minimum expression is considered for the test. In our implementation, we also include the option of taking the mean expression of all molecules in the

complex. Our implementation also employs Omnipath<sup>13</sup> as ligand-receptor interaction annotation. A larger database that contains the original CellphoneDB database together with 5 other resources (see Turei et al.<sup>13</sup>). Finally, our implementation leverages just-in-time compilation with Numba<sup>11</sup> to achieve greater performances in computation time (see **Supplementary figure 1**).

**Ripley's K function** is a spatial analysis method used to describe whether points with discrete annotation in space follow random, dispersed or clustered patterns. Ripley's K function can be used to describe the spatial patterning of cell clusters in the area of interest. Ripley's K function is defined as

$$K(t) = A \sum_{i=1}^n \sum_{j=1}^n w_{i,j} I(d_{i,j} < t) \quad (1)$$

Where  $I(d_{i,j} < t)$  is the indicator function, that sets whether the operand is 1 or 0 based on the (euclidean) distance  $d_{i,j}$  evaluated at search radius  $t$ ,  $A$  is the average density of point in the area of interest and  $w_{i,j}$  is the edge effect correction (see Astropy implementation for details on this term<sup>14</sup>).

```
sq.gr.ripley_k(adata, cluster_key="<cluster_key>")
sq.pl.ripley_k(adata, cluster_key="<cluster_key>")
```

**Cluster co-occurrence ratio** provides a score on the co-occurrence of clusters of interest across spatial dimensions. It is defined as

$$\frac{p(exp|cluster)}{p(exp)} \quad (2)$$

where *cluster* is the annotation of interest to be used as conditioning for the co-occurrence of all clusters. It is computed across  $n$  radius of size  $d$  across the tissue area. It was inspired by an analysis performed by Tosti et al. to investigate tissue organization in the human pancreas with spatial transcriptomics<sup>15</sup>.

```
sq.gr.co_occurrence(adata, cluster_key="<cluster_key>")
sq.pl.co_occurrence(adata, cluster_key="<cluster_key>")
```

**Global Moran's I** is a spatial auto-correlation statistics, widely used in spatial data analysis. Given a feature (gene) and spatial location of observations, it evaluates whether the pattern expressed is clustered, dispersed, or random<sup>16</sup>. It is defined as:

$$I = \frac{n}{S_0} \frac{\sum_{i=1}^n \sum_{j=1}^n w_{i,j} z_i z_j}{\sum_{i=1}^n z_i^2} \quad (3)$$

where  $z_i$  is the deviation of the feature from the mean ( $x_i - \bar{X}$ ),  $w_{i,j}$  is the spatial weight between observations,  $n$  is the number of spatial units. We provide an wrapper for the global Moran's I statistics implemented in libpysal<sup>17</sup>. Test statistics and p values (computed from a permutation based test and further FDR corrected) are stored in `adata.uns["morani"]`.

```
sq.gr.moran(adata, cluster_key="<cluster_key>")
```

**Centrality scores** provide a numerical analysis on node patterns in the graph, which helps to better understand complex dependencies in large graphs. A centrality is a function  $C$  which assigns every vertex  $v$  in the graph a numeric value  $C(v) \in \mathbb{R}$ . It therefore gives a ranking of the single components (i.e. cells) in the graph which simplifies to identify key individuals. Group centrality measures have been introduced by Everett and Borgatti<sup>18</sup>. They provide a framework to assess

clusters of cells in the graph, i.e. is a specific cell type more central or more connected in the graph than others. Let  $G = (V, E)$  be a graph with nodes  $V$  and edges  $E$ . Additionally, let  $S$  be a group of nodes allocated to the same cluster  $c_S$ . Then  $N(S)$  defines the neighbourhood of all nodes in  $S$ . The following four (group) centrality measures are implemented. **Group degree centrality** is defined by the fraction of non-cluster members that are connected to cluster members, so

$$C_{deg}(S) = \frac{|N(S) - S|}{|V| - |S|} \in [0, 1].$$

Larger values indicate a more central cluster. Group degree centrality can help to identify essential clusters or cell types in the graph. **Group closeness centrality** measures how close the cluster is to other nodes in the graph and is calculated by the number of non-group members divided by the sum of all distances from the cluster to all vertices outside the cluster, so

$$C_{clos}(S) = \frac{|V - S|}{\sum_{v \in V_S} d_{S,v}} \in [0, 1]$$

where  $d_{S,v} = \min_{u \in S} d_{u,v}$  is the minimal distance of the group  $S$  from  $v$ . Hence, larger values indicate a greater centrality. **Group betweenness centrality** measures the proportion of shortest paths connecting pairs of non-group members that pass through the group. Let  $S$  be a subset of a graph with vertex set  $V_S$ . Let  $g_{u,v}$  be the number of shortest paths connecting  $u$  to  $v$  and  $g_{u,v}(S)$  be the number of shortest paths connecting  $u$  to  $v$  passing through  $S$ . The group betweenness centrality is then given by

$$C_{betw}(S) = \sum_{u < v} \frac{g_{u,v}(S)}{g_{u,v}} \quad \text{for } u, v \notin S.$$

The properties of this centrality score are fundamentally different from degree and closeness centrality scores, hence results often differ. The last measure described is the **average clustering coefficient**. It describes how well nodes in a graph tend to cluster together. Let  $n$  be the number of nodes in  $S$ . Then the average clustering coefficient is given by

$$C_{cluster}(S) = \frac{1}{n} \sum_{v \in S} \frac{2T(v)}{deg(v)(deg(v) - 1)}$$

with  $T(v)$  being the number of triangles through node  $v$  and  $deg(v)$  the degree of node  $v$ . The describes centrality scores have been implemented using the NetworkX library in python<sup>19</sup>.

```
sq.gr.centrality_scores(adata, cluster_key="<cluster_key>")
sq.pl.centrality_scores(adata, cluster_key="<cluster_key>", selected_score="<selected_score>")
```

**Interaction matrix** represents the total number of edges that are shared between nodes with specific attributes (e.g. clusters or cell types).

```
sq.gr.interaction_matrix(adata, cluster_key="<cluster_key>", normalized=True)
sq.pl.interaction_matrix(adata, cluster_key="<cluster_key>")
```

Python implementations relies ont the NetworkX library<sup>19</sup>.

### 3 Image analysis and segmentation

**Image processing** Before extracting features from microscopy images, the images can be pre-processed. Squidpy implements functions for commonly used preprocessing functions like conversion to gray-scale or smoothing using a gaussian kernel.

```
sq.im.process(img, method="gray")
img.show()
```

Implementations are based on the Scikit-image package<sup>20</sup> and allow processing of very large images through tiling the image into smaller crops and processing these.

**Image segmentation** Nuclei segmentation is an important step when analysing microscopy images. It allows the quantitative analysis of the number of nuclei, their areas, and morphological features. There are a wide range of approaches for nuclei segmentation, from established techniques like thresholding to modern deep learning-based approaches.

A difficulty for nuclei segmentation is to distinguish between partially overlapping nuclei. Watershed is a classic algorithm used to separate overlapping objects by treating pixel values as local topology. For this, starting from points of lowest intensity, the image is flooded until basins from different starting points meet at the watershed ridge lines.

```
sq.im.segment(img, method="watershed")
img.show()
```

Implementations in Squidpy are based on the original Scikit-image python implementation<sup>20</sup>.

**Custom approaches with deep learning** Depending on the quality of the data, simple segmentation approaches like watershed might not be appropriate. Nowadays, many complex segmentation algorithms are provided as pre-trained deep learning models, such as Stardist<sup>21</sup>, Splinedist<sup>22</sup> and Cellpose<sup>23</sup>. These models can be easily used within the segmentation function.

```
sq.im.segment(img, method=<pre-trained model>)
img.show()
```

**Image features** Tissue organisation in microscopic images can be analysed with different image features. This filters relevant information from the (high dimensional) images, allowing for easy interpretation and comparison with other features obtained at the same spatial location. Image features are calculated from the tissue image at each location  $(x, y)$  where there is transcriptomics information available, resulting in a obs x features features matrix similar to the obs x gene matrix. This image feature matrix can then be used in any single-cell analysis workflow, just like the gene matrix.

The scale and size of the image used to calculate features can be adjusted using the `scale` and `spot_scale` parameters. Feature extraction can be parallelized by providing `n_jobs` (see Supplementary Figure 1). The calculated feature matrix is stored in `adata[key]`.

```
sq.im.calculate_image_features(adata, img, features=<list>, spot_scale=<float>,
                               scale=<float>, key_added=<str>)
```

*Summary features* calculate the mean, the standard variation or specific quantiles for a color channel. Similarly, *histogram features* scan the histogram of a color channel to calculate quantiles according a defined number of bins.

```
sq.im.calculate_image_features(adata, img, features="summary")
sq.im.calculate_image_features(adata, img, features="histogram")
```

*Textural features* calculate statistics over a histogram that describes the signatures of textures. To grasp the concept of texture intuitively the inextricable relationship between texture and tone is considered<sup>24</sup>: if a small-area patch of an image has little variation in its gray tone the dominant



property of that area is tone. If the patch has a wide variation of gray tone features, the dominant property of the area is texture. An image has a simple texture if it consists of recurring textural features. For a grey level image  $\mathbf{I}$  or e.g. a fluorescence color channel, a co-occurrence matrix  $\mathbf{C}$  is computed.  $\mathbf{C}$  is a histogram over pairs of pixels  $(i, j)$  with specific values  $(p, q) \in [0, 1, \dots, 255]^2$  and a fixed pixel offset:

$$\mathbf{C}_{p,q} = \sum_i \delta_{\mathbf{I}(i),p} \delta_{\mathbf{I}(j),q} \quad (4)$$

with Kronecker-Delta  $\delta$ . The offset is a fixed pixel distance from  $i$  to  $j$  under a fixed direction angle. Based on the co-occurrence matrix different meaningful statistics (*texture properties*) can be calculated which summarize textural pattern characteristics of the image:

$$\begin{aligned} \sum_{p,q} \mathbf{C}_{p,q} (p - q)^2 & \quad \text{contrast} \\ \sum_{p,q} \mathbf{C}_{p,q} |p - q| & \quad \text{dissimilarity} \\ \sum_{p,q} \frac{\mathbf{C}_{p,q}}{1 + (p - q)^2} & \quad \text{homogeneity} \\ \sum_{p,q} \mathbf{C}_{p,q}^2 & \quad \text{ASM} \\ \sum_{p,q} \mathbf{C}_{p,q} \frac{(p - \mu_p)(q - \mu_q)}{\sqrt{\sigma_p^2 \sigma_q^2}} & \quad \text{correlation.} \end{aligned} \quad (5)$$

```
sq.im.calculate_image_features(adata, img, features="texture")
```

All the above implementations rely on the Scikit-image python package<sup>20</sup>.

**Segmentation features** Similar to *image features* that are extracted from raw tissue images, *segmentation features* can be extracted from a segmentation object (3). These features allow to get statistics over the number, area, and morphology of the nuclei in one image. To compute these features, the Image Container `img` needs to contain a segmented image at layer `<segmented_img>`

```
sq.im.calculate_image_features(adata, img, features="segmentation", features_kwargs={
    "label_layer": <segmented_img>})
```

**Custom features based on deep learning models** Squidpy feature calculation function can also be used with custom user-defined features extraction functions. This enables the use of e.g., pre-trained deep learning models as feature extractors.

```
sq.im.calculate_image_features(adata, img, features="custom", features_kwargs={
    "func": <pre-trained keras model>})
```

## References

- [1] F Pedregosa, et al. Scikit-learn: Machine learning in python. *of machine Learning . . .*, 2011.
- [2] Charles R Harris, et al. Array programming with NumPy. *Nature*, 585(7825):357–362, September 2020.
- [3] Pauli Virtanen, et al. SciPy 1.0: fundamental algorithms for scientific computing in python. *Nat. Methods*, 17(3):261–272, March 2020.
- [4] Thomas N. Kipf and Max Welling. Semi-supervised classification with graph convolutional networks, 2017.
- [5] S. Hoyer and J. Hamman. xarray: N-D labeled arrays and datasets in Python. *Journal of Open Research Software*, 5(1), 2017. doi: [10.5334/jors.148](https://doi.org/10.5334/jors.148). URL <http://doi.org/10.5334/jors.148>.
- [6] Dask Development Team. Dask: Library for dynamic task scheduling, 2016.
- [7] Sean Gillies et al. Rasterio: geospatial raster i/o for Python programmers, 2013–. URL <https://github.com/mapbox/rasterio>.
- [8] Alistair Miles, et al. zarr-developers/zarr-python: v2.4.0, January 2020.
- [9] Nicholas Sofroniew, et al. napari/napari: 0.4.4rc0, January 2021.
- [10] Denis Schapiro, et al. histoCAT: analysis of cell phenotypes and interactions in multiplex image cytometry data. *Nat. Methods*, 14(9):873–876, September 2017.
- [11] Siu Kwan Lam, et al. Numba: a LLVM-based python JIT compiler. In *Proceedings of the Second Workshop on the LLVM Compiler Infrastructure in HPC*, number Article 7 in LLVM '15, pages 1–6, New York, NY, USA, November 2015. Association for Computing Machinery.
- [12] Mirjana Efremova, et al. CellPhoneDB: inferring cell-cell communication from combined expression of multi-subunit ligand-receptor complexes. *Nat. Protoc.*, 15(4):1484–1506, April 2020.
- [13] Dénes Türei, et al. Integrated intra- and intercellular signaling knowledge for multicellular omics analysis. August 2020.
- [14] The Astropy Collaboration, et al. The astropy project: Building an inclusive, open-science project and status of the v2.0 core package. January 2018. [arXiv:1801.02634](https://arxiv.org/abs/1801.02634).
- [15] Luca Tosti, et al. Single nucleus and in situ rna sequencing reveals cell topographies in the human pancreas. *bioRxiv*, 2020. doi: [10.1101/733964](https://doi.org/10.1101/733964). [arXiv:https://www.biorxiv.org/content/early/2020/05/03/733964.full.pdf](https://arxiv.org/abs/https://www.biorxiv.org/content/early/2020/05/03/733964.full.pdf). URL <https://www.biorxiv.org/content/early/2020/05/03/733964>.
- [16] Arthur Getis and J K Ord. The analysis of spatial association by use of distance statistics. *Geogr. Anal.*, 24(3):189–206, September 2010.
- [17] Sergio J Rey and Luc Anselin. PySAL: A Python Library of Spatial Analytical Methods. *Rev. Reg. Stud.*, 37(1):5–27, 2007.
- [18] Martin Everett and Stephen Borgatti. The centrality of groups and classes. *Journal of Mathematical Sociology*, 23:181–201, 01 1999. doi: [10.1080/0022250X.1999.9990219](https://doi.org/10.1080/0022250X.1999.9990219).
- [19] Aric A. Hagberg, et al. Exploring network structure, dynamics, and function using networkx. In Gaël Varoquaux, et al., editors, *Proceedings of the 7th Python in Science Conference*, pages 11 – 15, Pasadena, CA USA, 2008.
- [20] Stéfan van der Walt, et al. scikit-image: image processing in Python. *PeerJ*, 2:e453, June 2014.
- [21] Uwe Schmidt, et al. Cell detection with star-convex polygons. *Lecture Notes in Computer Science*, page 265–273, 2018. ISSN 1611-3349. doi: [10.1007/978-3-030-00934-2\\_30](https://doi.org/10.1007/978-3-030-00934-2_30). URL [http://dx.doi.org/10.1007/978-3-030-00934-2\\_30](http://dx.doi.org/10.1007/978-3-030-00934-2_30).
- [22] Soham Mandal and Virginie Uhlmann. SplineDist: Automated cell segmentation with spline curves. January 2021.
- [23] Carsen Stringer, et al. Cellpose: a generalist algorithm for cellular segmentation. *Nat. Methods*, 18(1): 100–106, January 2021.

- [24] Robert M Haralick, et al. Textural features for image classification. *IEEE Transactions on systems, man, and cybernetics*, (6):610–621, 1973.
